# Supplementary material for: Investigation on the structural, morphological, electronic and photovoltaic properties of a perovskite thin film by introducing lithium halide
Source: Royal Society of Chemistry journal article supplement (doi:10.1039/c8ra01199k), 2018-01-01
Supplement: c8ra01199k1.pdf [file c8ra01199k1.pdf]

# **Investigation on structural, morphological, electronic and photovoltaic properties of perovskite thin film by introducing lithium halide**

Zhenhua Lin,<sup>a,#</sup> Hai Zhu,<sup>b,#</sup> Long Zhou,<sup>a</sup> Jianhui Du,<sup>a</sup> Chunfu Zhang,<sup>a</sup> Qing-Hua Xu,<sup>b</sup>

Jingjing Chang,<sup>a\*</sup> Jianyong Ouyang,<sup>c</sup> Yue Hao<sup>a</sup>

<sup>a</sup>State Key Laboratory of Wide Band Gap Semiconductor Technology, Shaanxi Joint Key Laboratory of Graphene, School of Microelectronics, Xidian University, 2 South

Taibai Road, Xi'an, China 710071. Mail: [jjingchang@xidian.edu.cn](mailto:jjingchang@xidian.edu.cn)

<sup>b</sup>Department of Chemistry, National University of Singapore, 3 Science Drive 3,  
Singapore 117543.

<sup>c</sup>Department of Materials Science and Engineering, National University of Singapore,  
7 Engineering Drive 1, Singapore 117574.

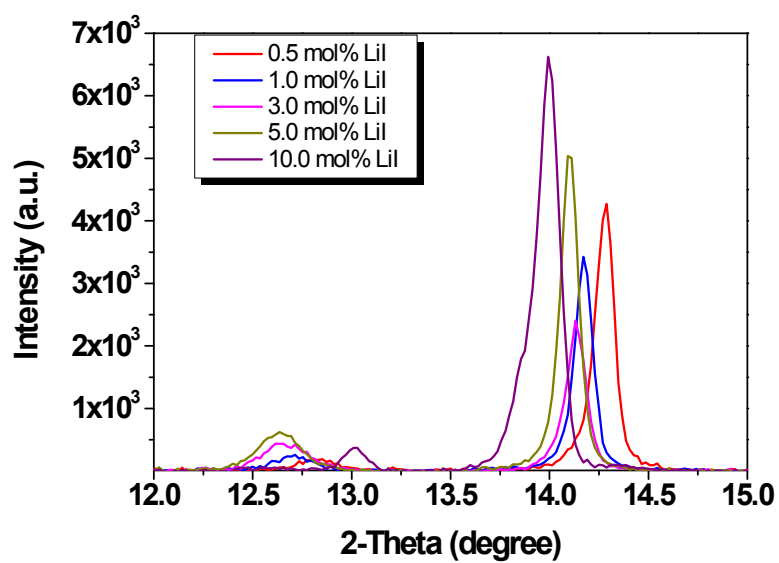

**Figure S1.** Zoom-in XRD spectra for perovskite thin films with different molar doping ratios of LiI.

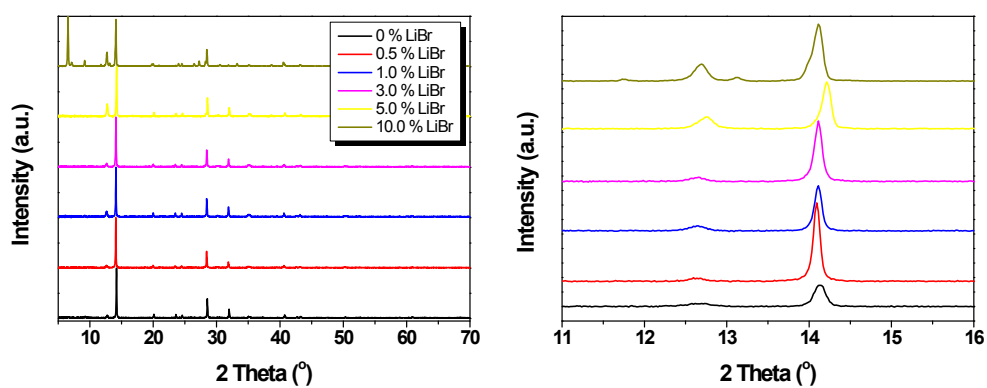

**Figure S2.** XRD spectra of perovskite thin films with different molar doping ratios of LiBr.

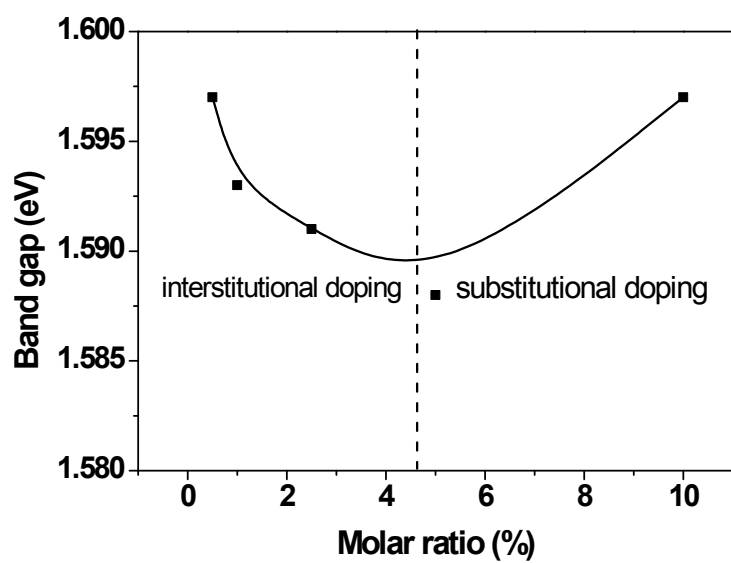

**Figure S3.** The band gap of Li doped perovskite as a function of doping ratio.

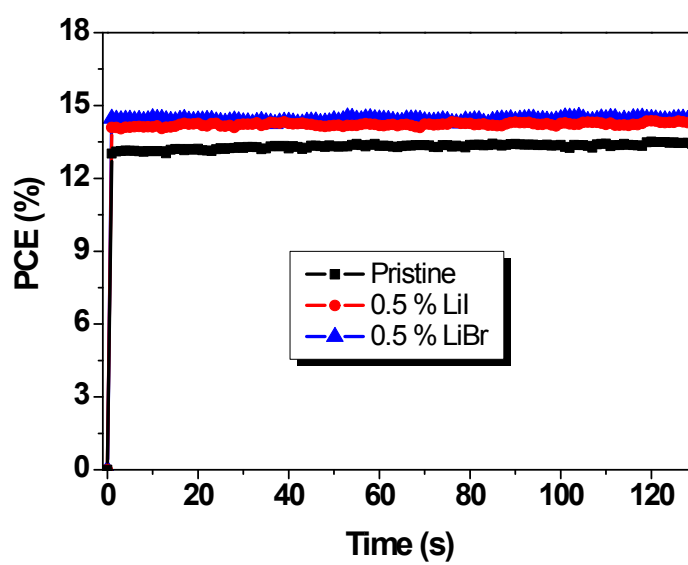

**Figure S4.** Steady-state PCE output of the devices at maximum power point of pristine and Li doped perovskite devices.
